# Supplementary material for: Thymol improves salinity tolerance of tobacco by increasing the Na+ efflux and enhancing the content of NO and GSH
Source: Research Square preprint supplement (doi:10.21203/rs.3.rs-745750/v2), 2021-10-15
Supplement: Supplementary file 2 [file 988bf5cbc66695b380344ac1.xlsx]

## Sheet: Fig.1
	a							b
	NaCl (mM)	0	50	100	150	200			Without NaCl					With NaCl						c
	Root length (cm)	2.3	1.9	1.4	1	0.7			S0	S50	S100	S150	S200	YS0	YS50	YS100	YS150	YS200		Tme (h)	0				12				24				36				48				60				72
	Root length (cm)	1.5	2.1	1.6	1.1	0.7		Root length (cm)	1.75	1.5	1.4	1.25	1.2	0.95	1.6	1.2	1	0.7		Treatment	C	S	T	S+T	C	S	T	S+T	C	S	T	S+T	C	S	T	S+T	C	S	T	S+T	C	S	T	S+T	C	S	T	S+T
	Root length (cm)	1.5	2.5	1.3	0.8	0.7		Root length (cm)	1.9	1.4	1.4	1.5	1.4	0.9	1.55	1.4	1	0.75		Root length(cm)	0.6	0.45	0.5	0.65	0.75	0.65	0.7	0.65	0.9	0.65	1.1	0.85	1.05	0.75	1	1.05	1.2	0.9	1.25	1.2	1.3	0.8	1.7	1.3	1.6	1.1	1.4	1.45
	Root length (cm)	1.5	2	1.5	0.8	0.7		Root length (cm)	1.8	1.45	1.3	1.25	1.3	1	1.2	1.3	0.9	0.8		Root length(cm)	0.6	0.55	0.6	0.55	0.8	0.7	0.85	0.75	1	0.75	1.05	0.85	1.3	0.85	1.3	1.05	1.6	1	1.4	1.2	1.7	0.8	1.25	1.5	1.6	0.9	1.5	1.45
	Root length (cm)	1.6	1.5	1.2	1	0.7		Root length (cm)	1.75	1.6	1.25	1.4	1.2	0.9	1.5	1.3	0.95	1.1		Root length(cm)	0.55	0.55	0.6	0.55	0.7	0.7	0.65	0.75	0.95	0.8	0.7	0.85	1.2	0.85	1.3	0.85	1.2	0.95	1.5	1.2	1.4	0.95	1.4	1.2	1.8	0.9	1.6	1.65
	Root length (cm)	1.6	1.7	1.2	1	0.7		Root length (cm)	1.8	1.5	1.4	1.4	1.4	0.9	1.6	1.2	0.9	0.9		Root length(cm)	0.55	0.55	0.6	0.55	0.75	0.65	0.8	0.75	1.1	0.6	1.1	0.8	0.95	0.95	1	1.05	1.45	1.05	1.2	1.2	1.6	0.8	1.2	1.2	1.5	0.95	1.5	1.45
	Root length (cm)	1.8	1.8	1.3	1	0.8		Root length (cm)	1.7	1.6	1.4	1.4	1.4	0.9	1.9	1.2	0.95	0.95		Root length(cm)	0.55	0.45	0.5	0.6	0.75	0.7	0.7	0.6	0.8	0.7	1.1	0.9	1.25	0.75	1	0.85	1.4	0.85	1.1	1.3	1.6	0.8	1.6	1.5	1.8	1	1.7	1.55
	Root length (cm)	2.1	1.7	1.2	1	0.7		Root length (cm)	1.8	1.7	1.3	1.25	1.4	1	1.4	1.4	1	0.95		Root length(cm)	0.55	0.45	0.6	0.55	0.85	0.55	0.7	0.55	1.1	0.75	1.05	0.95	1.4	0.7	1.2	1.05	1.6	0.8	1.3	1.15	1.75	0.85	1.5	1.3	1.6	0.9	1.5	1.35
	Root length (cm)	1.4	1.6	1.5	1.2	0.9		Root length (cm)	1.75	1.6	1.4	1.4	1.35	0.9	1.7	1.2	1.1	1		Root length(cm)	0.55	0.55	0.55	0.5	0.8	0.6	0.85	0.7	1	0.7	0.9	0.8	1.4	0.85	1.1	1	1.7	0.9	1.2	1.15	1.85	0.9	1.3	1.3	1.7	0.9	1.5	1.65
	Root length (cm)	1.8	1.8	1.15	0.9	0.7		Root length (cm)	1.9	1.5	1.5	1.4	1.25	1.1	1.6	1.4	0.9	0.9		Root length(cm)	0.45	0.55	0.55	0.5	0.65	0.65	0.75	0.65	0.95	0.75	0.95	0.8	1.2	0.8	1.25	1.05	1.5	0.9	1.4	1.3	1.6	0.8	1.2	1.4	1.9	0.9	1.6	1.65
	Root length (cm)	1.7	1.7	1.15	0.9	0.8		Root length (cm)	1.65	1.55	1.6	1.3	1.35	0.9	1.3	1.3	1	0.8		Root length(cm)	0.55	0.45	0.5	0.5	0.8	0.45	0.6	0.55	0.8	0.75	1.15	0.9	1.2	0.75	0.8	0.95	1.5	0.6	1.8	1.1	1.7	0.95	1.3	1.25	1.6	1	1.65	1.35
	Root length (cm)	1.6	1.6	1.1	1	0.9		Root length (cm)	1.6	1.4	1.5	1.2	1.3	1.1	1.3	1.2	1	0.9		Root length(cm)	0.45	0.55	0.5	0.5	0.7	0.6	0.8	0.75	1.15	0.7	1.05	0.85	1	0.95	1.4	0.95	1.1	1	1.6	1.1	1.3	0.8	1.4	1.3	1.6	1.1	1.5	1.4
	Root length (cm)	1.6	2.1	1.1	1.2	0.7		Root length (cm)	1.6	1.45	1.4	1.4	1.4	1.1	1.4	1.3	0.9	0.95		Root length(cm)	0.55	0.55	0.5	0.5	0.7	0.65	0.6	0.7	0.9	0.7	0.75	0.85	1.1	0.85	0.85	1.15	1.2	0.9	1	1.2	1.85	0.9	1.4	1.4	1.5	0.9	1.4	1.55
	Root length (cm)	1.7	1.7	1.3	1.1	0.9		Root length (cm)	1.7	1.4	1.5	1.2	1.2	0.95	1.4	1.2	0.9	0.9		Root length(cm)	0.55	0.55	0.5	0.5	0.75	0.55	0.7	0.7	1.4	0.7	0.8	0.9	1	0.8	1	1	1.3	0.9	1.3	1	1.3	1	1.6	1.4	1.7	1	1.6	1.4
	Root length (cm)	1.6	1.6	1.2	0.9	0.6		AVERAGE	1.74615	1.51154	1.41154	1.33462	1.31923	0.969231	1.49615	1.27692	0.961538	0.892308		Root length(cm)	0.55	0.55	0.5	0.6	0.8	0.5	0.75	0.85	1.1	0.7	0.8	0.75	1.1	0.85	1.05	1.1	1.3	0.95	1.3	1.2	1.3	1	1.6	1.5	1.75	1	1.6	1.55
	Root length (cm)	1.5	1.5	1.7	1.2	0.7		STDEV	0.0929465	0.0902003	0.0923077	0.0927872	0.0797555	0.0797555	0.182358	0.0799408	0.0593356	0.103489		Root length(cm)	0.55	0.65	0.5	0.6	0.75	0.5	0.7	0.85	1	0.75	0.85	0.85	1	0.95	0.9	1.05	1.3	1	1.1	1.1	1.4	1.05	1.3	1.35	1.9	1.1	1.6	1.5
	Root length (cm)	1.7	1.7	1.8	0.8	0.6														Root length(cm)	0.55	0.65	0.5	0.5	0.7	0.6	0.7	0.8	1.05	0.6	0.9	0.7	1	0.95	0.9	1	1.1	1	1.05	1	1.75	0.9	1.3	1.45	1.7	0.9	1.7	1.55
	Root length (cm)	1.8	1.4	1.6	1	0.85														Root length(cm)	0.55	0.75	0.5	0.6	0.65	0.65	0.5	0.65	1.1	0.65	0.5	0.85	1.05	1.05	0.95	1.15	1.3	1.2	1.6	1.1	1.4	0.8	1.55	1.3	1.9	1	1.4	1.55
	Root length (cm)	2	1.6	1.1	1.2	0.7														Root length(cm)	0.5	0.65	0.5	0.5	0.7	0.6	0.7	0.85	0.8	0.75	0.95	1.05	1.1	0.95	1	0.95	1.3	1.05	0.9	1.1	1.5	1	1.2	1.35	1.7	0.9	1.6	1.45
	Root length (cm)	1.6	1.6	1.4	1.2	0.6														Root length(cm)	0.55	0.55	0.5	0.5	0.7	0.55	0.65	0.65	0.75	0.6	0.8	0.85	1	0.75	1	0.95	1.2	0.8	1.1	1.1	1.85	0.9	1.6	1.5	1.8	1.1	1.4	1.65
	Root length (cm)	1.8	1.7	1.4	1.25	0.7														Root length(cm)	0.55	0.45	0.5	0.5	0.85	0.65	0.7	0.6	0.8	0.65	0.95	0.9	0.9	0.65	0.95	0.95	1.5	0.7	0.9	1.1	1.7	0.8	1.2	1.3	1.9	0.95	1.8	1.45
	Root length (cm)	1.7	1.6	1.3	1.4	0.7														Root length(cm)	0.55	0.45	0.5	0.5	0.8	0.55	0.75	0.6	0.95	0.65	0.95	0.9	1.2	0.7	0.9	0.85	1.4	0.7	1.1	0.8	1.6	0.9	1.6	1.3	1.8	0.9	1.75	1.65
	Root length (cm)	1.8	1.8	1.4	1.3	0.8														Root length(cm)	0.55	0.55	0.5	0.5	0.7	0.6	0.8	0.7	0.8	0.65	0.95	0.95	1.1	0.65	1.3	0.95	1.4	0.8	1.55	1.4	1.5	0.9	1.4	1.4	1.7	1.1	1.3	1.35
	Root length (cm)	1.7	1.5	1.5	1.3	1														Root length(cm)	0.45	0.55	0.4	0.5	0.45	0.55	0.75	0.65	0.75	0.65	0.9	0.65	0.95	0.65	0.8	0.9	0.8	0.75	1	1.2	1.4	0.9	1.4	1.3	1.8	1	1.6	1.45
	Root length (cm)	1.8	1.7	1.2	1.1	0.6														Root length(cm)	0.45	0.55	0.4	0.5	0.55	0.55	0.7	0.6	0.9	0.7	0.65	0.65	1.1	0.65	1.1	0.95	1.3	0.8	1.2	1.3	1.55	1	1.5	1.5	1.7	1	1.4	1.45
	AVERAGE	1.708	1.736	1.344	1.066	0.738														Root length(cm)	0.45	0.55	0.4	0.5	0.6	0.6	0.7	0.65	0.85	0.75	0.8	0.85	1.1	0.65	0.9	0.85	1.4	0.8	1	1.3	1.6	1	1.2	1.4	1.65	1	1.4	1.55
	STDEV	0.197828	0.233032	0.191478	0.164146	0.103228														Root length(cm)	0.45	0.45	0.5	0.5	0.65	0.55	0.65	0.65	0.95	0.55	1	0.9	1	0.6	1.25	0.85	1.25	0.7	1.4	1.2	1.4	0.9	1.3	1.45	1.8	1.05	1.4	1.45
																				Root length(cm)	0.45	0.45	0.4	0.5	0.7	0.55	0.75	0.55	0.8	0.65	0.8	0.8	1.1	0.75	1.1	0.85	1.5	0.6	1.2	1.3	1.6	1	1.7	1.5	1.6	0.9	1.4	1.45
																				Root length(cm)	0.55	0.45	0.5	0.5	0.7	0.65	0.75	0.6	1	0.55	1.05	0.8	1.3	0.65	1	0.95	1.4	0.7	1.1	1.2	1.5	1.05	1.15	1.3	1.6	1.05	1.6	1.55
																				Root length(cm)	0.45	0.45	0.5	0.5	0.85	0.65	0.8	0.6	0.95	0.6	0.7	0.85	0.9	0.95	0.9	0.95	1.1	0.6	1.05	1	1.5	0.85	1.3	1.2	1.55	1.1	1.5	1.4
																				Root length(cm)	0.45	0.45	0.6	0.5	0.7	0.5	0.7	0.65	0.8	0.7	0.85	0.9	1.1	0.65	0.95	0.85	1.4	0.7	0.8	1.2	1.6	0.8	1.3	1.3	1.8	1.1	1.7	1.35
																				Root length(cm)	0.45	0.55	0.4	0.5	0.7	0.45	0.6	0.6	0.9	0.7	0.7	0.75	1.2	0.65	0.85	0.75	1.4	0.6	0.8	1.1	1.6	0.8	1.3	1.2	1.8	1.2	1.4	1.55
																				AVERAGE	0.518333	0.53	0.503333	0.525	0.718333	0.59	0.711667	0.673333	0.943333	0.68	0.893333	0.841667	1.10833	0.785	1.03333	0.961667	1.33667	0.84	1.20667	1.16	1.55667	0.896667	1.39167	1.355	1.71167	0.996667	1.53333	1.49333
																				STDEV	0.0507992	0.0748331	0.0590668	0.0423281	0.0861039	0.0687992	0.07603	0.0863456	0.142439	0.0627163	0.154236	0.083749	0.131709	0.123254	0.1609	0.0963356	0.17932	0.153514	0.24212	0.116476	0.164181	0.0845905	0.161804	0.0986154	0.117391	0.08557	0.125388	0.0955103

## Sheet: Fig.2
	e: SOD activity(U/g FW)						f: POD activity(U/g FW)						g: CAT activity(U/g FW)
	Treatment	C	S	T	S+T		Treatment	C	S	T	S+T		Treatment	C	S	T	S+T
	SOD activity	20.5122	36.8023	25.5125	30.7684		POD activity	12559.9	25612.6	13850.6	16182.2		CAT activity	51.1055	183.243	88.8986	95.493
	SOD activity	23.8654	36.1051	28.3656	31.6661		POD activity	12824.7	25096.8	14000	16458.5		CAT activity	56.453	200.889	75.0949	118.947
	SOD activity	25.7635	37.6458	27.3779	31.7002		POD activity	13595.4	24612.2	14790.3	16187.3		CAT activity	59.9036	182.89	68.7373	117.322
	AVERAGE	23.3804	36.8511	27.0853	31.3782		STDEV	439.238	408.485	412.29	129.067		AVERAGE	55.8207	189.007	77.577	110.588
	STDEV	2.17109	0.629917	1.183	0.431467		AVERAGE	12993.3	25107.2	14213.6	16276		STDEV	3.61952	8.40269	8.41584	10.6941

## Sheet: Fig.4
	b: GSH content (μmol/g FW)
		C	S	T	S+T
	GSH content	0.280696	0.40359	0.603976	0.768645
	GSH content	0.303823	0.433186	0.53563	0.78687
	GSH content	0.346389	0.407358	0.65967	0.726923
	AVERAGE	0.310303	0.414711	0.599759	0.760813
	STDEV	0.0272076	0.0131537	0.0507271	0.025092

## Sheet: Fig.5
	a: Root Na+ flux (pmol cm-2 s-1)						b: Root K+ flux (pmol cm-2 s-1)						c: Leaf Na+ flux (pmol cm-2 s-1)						d: Leaf K+ flux (pmol cm-2 s-1)
		C	S	T	S+T			C	S	T	S+T			C	S	T	S+T			C	S	T	S+T
		-35.3627	-49.1439	131.567	209.097			-28.4415	21.2634	19.8296	6.90402			-114.764	310.832	80.2407	139.996			90.1667	35.2383	-29.5635	-4.67026
		-21.5744	-83.6777	134.355	325.491			-31.8238	19.7674	9.30987	7.55241			-103.892	221.048	82.3631	165.522			104.818	34.5899	-18.7443	-6.18533
		-33.2369	-58.6864	82.6364	362.945			-34.7896	17.3913	16.8985	9.48956			-126.485	186.017	70.5112	191.856			84.2282	29.6758	-17.3501	-6.93441
	AVERAGE	-30.058	-63.836	116.186	299.178		AVERAGE	-31.685	19.474	15.346	7.982		AVERAGE	-115.047	239.299	77.705	165.791		AVERAGE	93.071	33.168	-21.886	-5.93
	STDEV	6.06129	14.561	23.7504	65.5062		STDEV	2.59345	1.59433	4.43275	1.09838		STDEV	9.22568	52.5643	5.16008	21.1726		STDEV	8.65307	2.48349	5.4586	0.9418
	e: Na+ content ( mg/g DW )						f: K+ content ( mg/g DW )
		C	S	T	S+T			C	S	T	S+T
		3.5215	60.4516	3.01546	42.6542			139.194	122.961	129.336	124.059
		3.86412	63.2565	3.6542	56.255			111.697	121.493	130.555	132.61
		4.72718	77.0884	3.23152	42.5474			148.58	140.347	109.586	133.886
	AVERAGE	4.0376	66.9322	3.30039	47.1522		AVERAGE	133.157	128.267	123.159	130.185
	STDEV	0.507273	7.27226	0.265273	6.4368		STDEV	15.6511	8.56261	9.6105	4.363

## Sheet: Fig.5-g
	Fig.5-f: Relative expression
NtSOS1	C				S				T				S+T
	ACTIN		NtSOS1		ACTIN		NtSOS1		ACTIN		NtSOS1		ACTIN		NtSOS1
CT	20.7483	20.7541	22.6696	22.824	19.7341	20.0866	23.3653	23.4128	21.2838	21.3126	25.8896	25.9012	18.6141	18.3733	23.4204	23.2927
	20.9679	20.7087	22.5224	22.4619	19.9291	20.5448	23.7908	23.8188	21.2224	22.1009	26.0541	26.2786	18.5559	18.5184	23.0501	23.3584
	21.5106	21.9956	22.8964	23.1851	19.3337	19.1518	22.1533	22.1786	21.4544	21.6496	25.5788	25.5037	18.8896	19.3351	23.5562	23.706
NtHKT1	C				S				T				S+T
	ACTIN		NtHKT1		ACTIN		NtHKT1		ACTIN		NtHKT1		ACTIN		NtHKT1
CT	20.8451	21.4372	23.8996	24.3305	19.997	19.6136	21.8508	21.7416	18.5898	18.5654	22.7195	22.4235	20.736	20.8752	24.2264	23.7764
	20.7621	21.5621	23.3911	23.1028	19.7943	19.3728	20.1289	20.3919	18.3386	18.796	21.8459	22.4537	20.9345	20.1605	23.4357	23.6905
	21.4119	21.6216	23.606	23.9898	19.0127	19.1477	21.0795	20.8228	17.3944	17.7715	21.0587	21.0072	20.2512	20.2356	23.6086	23.4309
NtNHX1	C				S				T				S+T
	ACTIN		NtNHX1		ACTIN		NtNHX1		ACTIN		NtNHX1		ACTIN		NtNHX1
CT	22.5045	22.1108	22.9113	22.9285	19.9961	20.0371	23.0598	23.1303	22.2566	22.3841	25.9108	26.0061	22.6773	22.6827	26.6307	26.6206
	22.6724	22.5149	22.8571	22.8227	19.8856	19.7482	22.5805	22.8176	21.6512	21.6059	25.0824	24.7951	22.4747	22.3443	26.8837	26.5116
	21.9803	21.8773	23.0054	23.0885	18.9692	19.0307	22.9891	23.491	21.7664	21.9375	25.4629	25.7139	22.2345	22.2141	26.9691	26.9717
AVERAGE	20.7512		22.7468		19.9104		23.3891		21.2982		25.8954		18.4937		23.3566
	20.8383		22.4921		20.2369		23.8048		21.6616		26.1663		18.5372		23.2042
	21.7531		23.0408		19.2427		22.166		21.552		25.5412		19.1124		23.6311
	21.1411		24.115		19.8053		21.7962		18.5776		22.5715		20.8056		24.0014
	21.1621		23.247		19.5836		20.2604		18.5673		22.1498		20.5475		23.5631
	21.5167		23.7979		19.0802		20.9512		17.583		21.0329		20.2434		23.5198
	22.3077		22.9199		20.0166		23.0951		22.3203		25.9584		22.68		26.6256
	22.5936		22.8399		19.8169		22.6991		21.6285		24.9387		22.4095		26.6977
	21.9288		23.0469		18.9999		23.24		21.852		25.5884		22.2243		26.9704
ACTIN		1.64569	1.99553				3.47871				4.59725				4.86286
			1.65385				3.56784				4.50472				4.66706
			1.2877				2.92324				3.98923				4.51871
		2.44665	2.97391				1.99088				3.99386				3.19579
			2.08492				0.676822				3.58246				3.01565
			2.28112				1.87098				3.44999				3.27639
		0.658869	0.612236				3.07847				3.63811				3.94561
			0.246289				2.8822				3.31021				4.28821
			1.11808				4.2401				3.73641				4.74608
C			0.349839				1.48318				2.60171				2.86733
			0.00815693				1.91399				2.85087				3.0132
			-0.357996				1.63554				2.70153				3.23101
			0.527263				-0.983031				1.01995				0.22188
			-0.361729				-1.4081				1.49754				0.93073
			-0.165534				-0.41014				1.16887				0.99527
			-0.0466336				2.46623				3.02587				3.33338
			-0.412581				2.63591				3.06392				4.04192
			0.459214				3.12202				2.61833				3.62799
POWER			1.27442				2.79564				6.07008				7.29714
			1.00567				3.76849				7.21433				8.07356
			0.780248				3.10703				6.50491				9.38926
			1.44119				0.505916				2.02785				1.16625
			0.778231				0.376808				2.82361				1.90624
			0.891599				0.75255				2.24836				1.99345
			0.968193				5.52599				8.14476				10.0797
			0.751278				6.21568				8.36244				16.4717
			1.37479				8.70606				6.14037				12.3633
AVER			1.02011				3.22372				6.59644				8.25332
			1.03701				0.545091				2.36661				1.68865
			1.03142				6.81591				7.54919				12.9716
/			1.24929				2.74053				5.9504				7.15327
			0.985843				3.69419				7.0721				7.91438
			0.764865				3.04577				6.37666				9.20415
			1.38976				0.487861				1.95548				1.12463
			0.750459				0.363361				2.72285				1.83821
			0.85978				0.725694				2.16812				1.92231
			0.938698				5.35764				7.89664				9.77259
			0.728391				6.02632				8.10769				15.9699
			1.33291				8.44084				5.95331				11.9867
AVER			1	0.19802			3.16016	0.397647			6.46639	0.462305			8.0906	0.846488
			1	0.279193			0.525639	0.150315			2.28215	0.323487			1.62839	0.357859
			1	0.250572			6.60827	1.32427			7.31921	0.969674			12.5764	2.56418
			AVERAGE	STDEV			AVERAGE	STDEV			AVERAGE	STDEV			AVERAGE	STDEV

## Sheet: Fig.S1
	a: H2O2 content ( μmol/g FW )						b: MDA content ( nmol/g FW )
		C	S	T	S+T			C	S	T	S+T
	H2O2 content	0.4531	1.10995	0.557046	0.618667		MDA content	7.99303	9.01446	7.14237	7.76083
	H2O2 content	0.447322	1.16045	0.516851	0.600667		MDA content	6.37716	10.0382	6.95851	7.95156
	H2O2 content	0.47196	0.981009	0.583779	0.688667		MDA content	5.94015	8.92287	6.95851	7.58325
	AVERAGE	0.457461	1.0838	0.552559	0.636		AVERAGE	6.77012	9.32518	7.0198	7.76521
	STDEV	0.0105207	0.0755537	0.0275069	0.037959		STDEV	0.882946	0.505581	0.0866756	0.150391
